## RESEARCH ARTICLE

# Large hydropower projects increase stress despite compensation efforts: Evidence from the Brazilian Amazon

Adam Mayer<sup>1\*</sup>, Igor Cavallini Johansen<sup>2</sup>, Maria Claudia Lopez<sup>3</sup>, Mariluce Paes de Souza<sup>4</sup>, Emilio F. Moran<sup>1</sup>

**1** Center for Earth Observations and Global Change, Michigan State University, East Lansing, MI, United States of America, **2** Center for Environmental Studies and Research–Nepam, State University of Campinas, Campinas, SP, Brazil, **3** Department of Community Sustainability, Michigan State University, East Lansing, MI, United States of America, **4** Programa de Pós-Graduação em Administração, Universidade Federal de Rondônia, Rondônia, Brazil

\* [mayerada@msu.edu](mailto:mayerada@msu.edu)

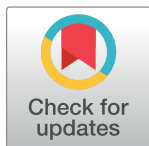

## OPEN ACCESS

**Citation:** Mayer A, Cavallini Johansen I, Lopez MC, Paes de Souza M, Moran EF (2023) Large hydropower projects increase stress despite compensation efforts: Evidence from the Brazilian Amazon. PLoS ONE 18(7): e0284760. <https://doi.org/10.1371/journal.pone.0284760>

**Editor:** Muhammad Tayyab Sohail, Xiangtan University, CHINA

**Received:** May 6, 2022

**Accepted:** April 8, 2023

**Published:** July 14, 2023

**Copyright:** © 2023 Mayer et al. This is an open access article distributed under the terms of the [Creative Commons Attribution License](https://creativecommons.org/licenses/by/4.0/), which permits unrestricted use, distribution, and reproduction in any medium, provided the original author and source are credited.

**Data Availability Statement:** All relevant data is within the paper and [Supporting Information](#) files.

**Funding:** This work was supported by National Science Foundation Grants #1639115 and #2020790 awarded to EM and MCL. The funders had no role in study design, data collection and analysis, decision to publish, or preparation of the manuscript.

**Competing interests:** The authors have declared that no competing interests exist.

## Abstract

Large hydropower projects continue to be built in developing nations, despite their known negative impacts. Large-scale energy projects strain local infrastructure and reduce access to infrastructure for households that live near them. Here we investigate the link between large-scale hydropower projects and stress. Our results suggest that these projects create stress through two mechanisms: strains on community resources and through the process of displacement. We also ask how compensation and resettlement programs condition these relationships. Using data from the Madeira river basin in the Brazilian Amazon, we find that hydropower projects increase stress by reducing access to energy, water, sanitation and land. Compensation provided was not sufficient to moderate this effect.

## Introduction

Over the past 50 years, developing nations have turned to hydropower to provide a stable energy source for their growing populations, facilitate economic development, and improve their position geo-politically by not relying upon expensive imported energy [1]. This has been especially true in Brazil, where the central government, regardless of who has held power, has actively encouraged large hydropower projects for decades as part of its vision for economic development. Currently, Brazil is one of the most hydropower dependent nations on earth (67%) for its electricity. As of 2019, there were 158 dams in operation and another 351 in the planning phases in the Brazilian Amazon [2], and since only 50% of the Amazon's hydropower potential is currently used, more may be coming in the years ahead [3]. The Brazilian government has often approved the construction of dams before environmental impact assessments have been completed and despite widespread opposition against them, most notably in the case of the Belo Monte dam [4–6].

Although dams provide many benefits at a national scale (e.g., affordable and stable energy, an alternative to fossil fuels and energy independence), there are numerous negative impacts

that occur in communities and regions that host large-scale hydropower dams. Among ecological impacts, perhaps the most well-documented damages are increases in deforestation and the impacts on river ecology, fisheries, and biodiversity, with consequent impact on local's livelihoods and food security [7–11]. Hydropower may have some advantages over fossil fuels (e.g., lower carbon dioxide emissions), yet its ecological impacts and indirect contributions to emissions cast serious doubt on its credentials as a “green” or “clean” energy source [2, 12–15], more so in the tropics where studies have shown that dams generate greenhouse gases such as methane [16, 17]. Fan et al. [18] examined 610 dams worldwide of various sizes finding that within a 50 km radius of a dam there is consistent lower economic well-being measured in terms of GDP, decreased population size, and less vegetation measured by the Normalized Difference Vegetation Index (NDVI) than before the dams were built, and these impacts are proportional to the size of the dam. There are effects on human populations and host communities near hydropower projects. The aforementioned damages to fisheries has livelihood and nutritional consequences for peoples that rely on fisheries for income and food [8]. Undoubtedly, the largest social impact of dam construction is displacement [19–21]. An estimated 80 million people were displaced in the 20<sup>th</sup> century due to dams [22]. China's Three Gorges Dam, the largest in the world, entailed the resettlement of over 1.13 million people [23]. Authoritarian governments have often argued that hydropower and associated displacement was in the national interest and offered little to no redress to communities that were forced to move or otherwise experienced negative impacts in some way [24, 25]. Following the report of the World Commission on Dams in 2000, some governments and dam builders implemented compensation programs that provide housing, cash, credit, equipment of other types of compensation to households displaced from dam projects [25, 26]. Still, the fairness of these compensation programs is intensely debated [20, 27–29].

The “energy boomtown” literature from rural sociology provides some important insights into the processes that reduce well-being and quality of life in communities that host energy projects. This literature describes how energy infrastructure projects often located in rural places far removed from metropolitan areas with limited local capacity and unable to adjust to the sudden arrival of young, mostly male workers to the region seeking employment during a resource boom [30–32]. The arrival of these workers creates several challenges for communities. For one, local infrastructure like housing, sewage systems, and garbage services may not be able to handle the sudden influx. The energy workers might be privileged in terms of access to those resources, effectively crowding out access to key resources for the host population. This, in turn, increases stress and reduces well-being in the host community.

In the context of dam construction in developing countries, the “energy boomtown” literature has been used to show how dam construction affects not only host communities but other communities nearby [33]. In particular, constrained access to local infrastructure may be a primary mechanism by which dams reduce community well-being. Living conditions in many communities that host hydropower are often not ideal [21, 34, 35]. For example, communities near Brazil's Belo Monte dam were promised improved water and sanitation services, but these never materialized—in fact, sanitation conditions worsened during the construction of the dam [36–38]. A community resettled because of the Belo Monte dam reported that transportation was not available to get to town to access to many services like shopping and banking in the downtown area [33]. Studying China [39], found that displacement increased food insecurity and reduced income for some resettled households. Inadequate infrastructure after resettlement was also detailed by Green and Baird [40].

In this paper we extend research on hydropower impacts, compensation and well-being by asking the extent to which the “boomtown” impacts of hydropower, such as the deterioration of infrastructure such as electricity, land, water and sewage and the experience of resettlement,

influences stress levels among people living near the dams. A further goal of this paper is to understand whether compensation reduces the effect of these impacts. In doing so, we build upon the small literature that evaluates subjective well-being (e.g., stress, depression and general quality of life) in the context of hydropower projects [21, 41] and health and hydropower more generally [36, 37, 42–47].

## Displacement and compensation

Households that are displaced to make way for hydropower infrastructure are often resettled as part of a compensation program, but they may not be resettled near friends and family in their new location and experience a loss of social capital [38, 48, 49], they also may be resettled in settlements that do not have the same natural capital (losing access to common pool resources such as rivers) they use to have around, or move to a location that has land of worse quality than what they have before which creates a loss in people livelihoods [50–52]. Thus, resettled households may need to learn new skills and find new livelihoods and sources of income to be able to make a living in their new location.

Compensation strategies are meant to restore the livelihoods of people who are directly affected by the construction and operation of dams [27, 53]. Compensation is a mitigation mechanism to reduce social, economic and environmental impacts during the construction of the project and its aftermath [54]. However, compensation has been poorly implemented [27]. Dam companies and governments design resettlement programs to compensate displaced populations with cash payments or new housing [29] to prevent impoverishment and to reconstruct people's livelihoods [18]. Yu & Xu [54] used a social impact analysis framework to study compensation policies looking at different types of wealth: material, embodied, and relational. Material wealth refers to types of wealth that can be readily measured monetarily, such as land or various kinds of household assets. Embodied wealth is carried by a person, most notably skills and knowledge acquired through education and practice. Relational wealth refers to social infrastructure (e.g., social relationships, social capital) and physical infrastructure (e.g., transportation, healthcare facilities, schools) that are not directly owned by individuals but benefits them, their household, and community. In this paper we focus on material wealth and relational wealth in the form of community infrastructure.

Compensation programs have been routinely criticized as insufficient or unfair on a number of grounds. Wang et al.'s framework [54] helps to understand the dimensions of wealth that are offered and ignored by compensation programs, in particular embodied and relational. In addition, there are many households that are impacted by dams that often receive no compensation, or even considered impacted because they live downstream from the dam [29, 55]. The World Commission of Dams estimated that more than 470 million people living downstream from dams had been impacted by dam construction, but had never been compensated.

In terms of subjective well-being, understood as the way people self-evaluate their lives or experiences [56], displacement caused by development projects may lead to depression [57]. Xi & Hwang [41] report that communities displaced due to the Three Gorges Dam in China experienced a loss of social integration, which was associated with depressive symptoms. Cao & Hwang [58] extended this work by showing that a loss of social integration and community resources increased depression. On the other hand, Randell [59] finds that some households that were resettled and compensated to make way for Brazil's Belo Monte dam experienced improved wealth and subjective well-being, but that sample was far from typical since they were landowners with substantial land and cattle for which they were amply compensated early in the process. Mayer et al. [33] using data from the Madeira river basin in the Amazon,

show that social capital was reduced during and after the construction of the dams, thereby reducing well-being. More generally, psychological stress has long been identified as one of the outcomes of large-scale development projects like dams [59–61]. Thus, prior research is consistent in finding that the process of dam construction and operation creates various strains on community wealth in the form of infrastructure (e.g., land, sewage systems), strains that reduce well-being, but more research is warranted on this topic to understand how these changes might contribute to stress.

## Research questions

Following the diverse literature outlined above, we aim in this paper to evaluate the following research questions. First, following Cao & Hwang [58] as well as the boomtown literature (e.g., England & Albrecht [31]), we ask how the deterioration of already scarce access to infrastructure (e.g., electricity, land amount, water and sewage) increases stress levels. For our second research question, we investigate if compensation can moderate the impact of these losses on stress.

## Methods

### Study region

The current research is part of a broader, long-term research project into the effects of hydropower projects in multiple river basins in the Brazilian Amazon. This project involves regional partnerships with universities, extended qualitative interviews, qualitative field observations, survey research, and document analysis. For this paper, we rely upon data collected through survey research methodology in eight communities along the Madeira River near two large hydropower dams—the Santo Antônio and Jirau—that were constructed between 2008 and 2013 (Fig 1). Both dams were built with limited consultation with the proximate communities and construction began before environmental impact assessments (EIAs) had been completed [62–64]. The dams were funded by a combination of foreign and domestic investment [13]. Santo Antônio has an installed capacity of 3,568 MW and Jirau, of 3,750 MW. The Santo Antônio dam is 7km upstream from Porto Velho, the capital city of the state of Rondônia. Jirau is 125km upstream. Both are “run of the river” style dams that require limited water storage and allow water to flow at the same rate both upstream and downstream of the dam. Residents of the region engage in a variety of economic activities, ranging from fishing, agriculture, logging, small-scale mining, ranching, and various professions.

The construction of Jirau and Santo Antônio started with insufficient consultation with the impacted populations [62–65], in fact the dam consortia held only four public hearings in the region. Mayer et al. [66] show that participation by local communities was full of procedural injustices, and at the end community members were pressured to accept the construction of the dams. Years after the construction of the dams, reports from the field indicated that many households were still in litigation with the dam builders through the public prosecutor’s office to receive fair compensation. The dams have also contributed to flooding, which of course has multiple deleterious impacts for riverine and subsistence communities. Our collaborators in the region report that the dam builders and supportive government officials touted the dams as an economic boom for the region, but in general these promises have failed to materialize. For instance, the communities were promised fruit processing facilities that never became operational. Other research papers document the impacts to fisheries from these dams [7, 10, 67]. In addition to these community impacts, these factors could have also increased stress in the communities.

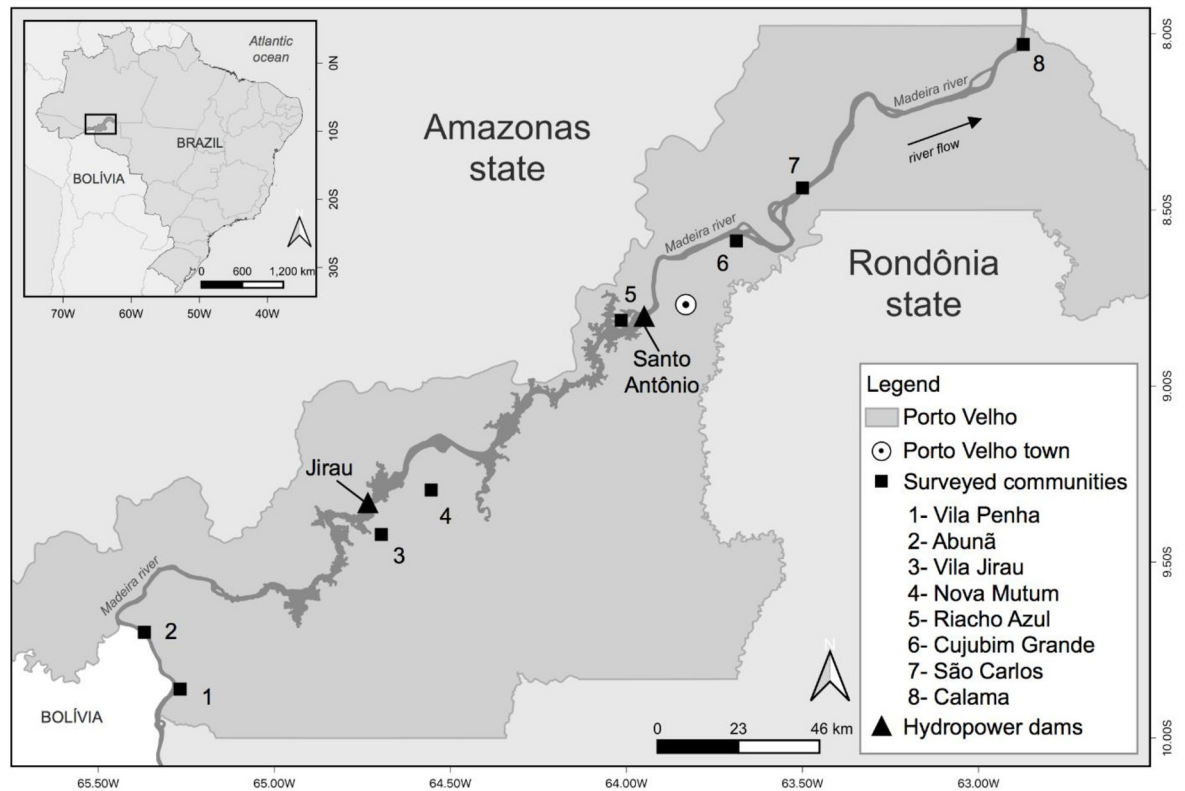

**Fig 1. Study area: Map of the surveyed communities in the Madeira river basin, Brazil.** Communities' names are numbered from 1 to 8. Hydropower dams are represented with black squares. The gray shaded area shows the Rondônia capital, Porto Velho municipality, and the white circle with a dot in the center indicates the location of the municipality seat, Porto Velho town. Porto Velho municipality is part of the Rondônia state, in the frontier with Amazonas state. Figure created with QGIS software version 3.14, an open source Geographic Information System (GIS) licensed under the GNU General Public License (<https://bit.ly/2BSPB2F>). Publicly available shape files provided from the Brazilian Institute of Geography and Statistics (IBGE) website (<https://bit.ly/34gMq0S>). River shape file retrieved from the Brazilian National Water Agency (ANA) website (<https://bit.ly/3Bx8ki1>). All utilized geographical data are under the Creative Commons Attribution License (CC BY 4.0).

<https://doi.org/10.1371/journal.pone.0284760.g001>

About 15% of the sample (described further below) reported that they received compensation and were resettled, but only 5% of those reported that they were given a choice as to how they would be compensated. Most (73%) reported receiving cash and nothing else. The rest had a varied mix of access to new fishing locations, boat motors, boats or canoes, inputs for agriculture, or even loans. Only one-percent of the resettled respondents stated that they had a choice in location where they would be resettled to.

### Data collection

We collected the survey data in the communities between August 2019 and March 2020 (data collection ended before the coronavirus pandemic shutdowns). Vila Penha and Abunã were not scheduled to be resettled. Yet at the time of the data collection, they were aware of possibly needing to be resettled due to unforeseen flooding levels generated by the construction of the dam. The flooded area was 67% larger than predicted in the pre-dam studies. Two communities—Nova Mutum and Riacho Azul—were created as resettled and compensated communities. In addition, Nova Mutum had a substantial neighborhood for dam staff remaining to operate the Jirau dam. Nova Mutum was built to resettle population from Mutum Parana, which was flooded to make way for Jirau dam. Riacho Azul also included resettled populations

from across the other side of the Madeira river who would be flooded by the reservoir. Vila Jirau existed before the dam and became a haven for resettled people who were unhappy with the Nova Mutum planned community's location. Cujubim Grande is largely composed of households that resettled from the 2014 flooding that led to their previous settlement collapsing into the river from the increased precipitation that year and the force of the water released to reduce water pressure on the dam. It is important to note that many of the initial residents of these communities—the initial people that were resettled—might have moved to other communities, and new people not resettled by the dams are now living in these houses. The remaining two communities, São Carlos and Calama, were downstream of the dams and the communities were not compensated nor resettled.

To develop the sampling frame, we used satellite imagery of each community, complemented by visits to communities to verify the existence of structures and identify houses and eliminate other structures (e.g., schools, churches). We numbered the homes and drew a random sample proportional to size in each community, using up to five contact attempts. Interviews were conducted by local university students that were supervised by two post-doctoral scholars headquartered in Porto Velho and all interviewers were local students fluent in Portuguese. Before we started the survey, we trained interviewers on data gathering procedures (e.g., use of tablets) and presented standard ethical guidelines used in data collection and management. Interviewers typically worked in pairs, using a numbered map to locate the sampled homes, we provided a list of alternative houses if they were unable to locate the residents from the initial draw.

After arriving at each home, the interviewers introduced themselves, explained their academic affiliation and the goals of the study and asked for the household's consent to proceed with the interview. We did not use a written consent form because of the relatively low levels of education among the participants. Instead, oral consent was requested and recorded before the start of the survey. The study procedures were approved by the institutional review boards of Universidade Federal de Rondônia and Michigan State University. One interviewer asked questions from the household head, while the other took notes and assisted with potential distractions, such as small children. Typically, the male head of the household completed the survey, although many female heads of household also completed the interview. [Table 1](#) provides the number of households sampled and number of completed interviews within each community, among other information.

Interviews lasted an average of 90 minutes, and the survey instrument had some 338 questions, although few respondents answered all these questions due to skip patterns. For

**Table 1. Communities sampled in the Madeira river basin, Brazil, from August 2019 to March 2020.**

|                | Location   | Number of structures in community | Completed Interviews |
|----------------|------------|-----------------------------------|----------------------|
| Vila Penha     | Upstream   | 148                               | 33                   |
| Abunã          | Upstream   | 212                               | 100                  |
| Vila Jirau     | Upstream   | 240                               | 71                   |
| Nova Mutum     | Upstream   | 267                               | 78                   |
| Riancho Azul   | Upstream   | 82                                | 52                   |
| Cujubim Grande | Downstream | 220                               | 78                   |
| São Carlos     | Downstream | 282                               | 108                  |
| Calama         | Downstream | 440                               | 151                  |
| Total          |            | 1,891                             | 671                  |

Note: Number of structures refers to the number of buildings that were visible from satellite imagery.

<https://doi.org/10.1371/journal.pone.0284760.t001>



instance, there were special sections for respondents who fished or worked in agriculture as a primary source of income. In any given community, between 3–5% of households refused to participate. Once completed, the interview location was automatically geocoded. The team gave a card to the respondent with contact information for a local collaborator who could answer questions about the project. We collected data from 671 households, or 35% of the total, based on face-to-face contact for a 3.04% margin of error to achieve a 95% confidence level, although the estimation sample used in our models below is somewhat lower due to missing data, as typically occurs in survey research. The excluded data did not compromise the statistical power of the analysis, since the calculation of the sample already considered the possibility of a small fraction of missing cases. We used eleven survey questions in this analysis. Survey questions and original anonymized data are available in [S1 Dataset](#).

### Outcome variable

This paper does not utilize a specific psychometric scale to assess stress levels [67, 68]. Our analysis is based on a question that allows the interviewee to subjectively present his/her level of emotional stress. Evaluations of well-being (e.g., stress, life satisfaction) routinely rely upon single indicators instead of additive scales [47, 69]. The advantage of our approach is that it allowed us to assess many other topics in our survey, as some scales for stress involve several questions. Respondents were asked the extent to which their emotional stress had improved, remained the same, or had increased due to the dams. We scored this variable such that higher categories indicate worse outcomes. Our understanding of stress does not center upon physiological processes (e.g., increased blood pressure) or behavioral changes to cope with stress (e.g., alcohol consumption, changes in appetite) [70]. Rather, we understand stress in a psychological sense as the appraisal of a situation as stressful, such as the construction of the dams and their impacts [67, 71, 72].

### Predictors: Compensation and community infrastructure

Respondents reported whether or not their household had been compensated and resettled. There was significant diversity of types of compensation, such that we use a binary indicator for receiving any type of compensation. Many respondents received housing, but others also received cash payments, fishing equipment, agricultural inputs, loans, or even boats. As previously mentioned, about 15% of the sample indicated that they had been resettled and compensated.

Respondents answered questions related to electricity access, land amount, water quality, water access, and sewage access after the construction of the dams. For instance, for the land amount variable, we asked: “Has the **amount** of land you and your household currently have remained the same, decreased, or increased (due to the building of the dam(s))?”. Other questions used a similar wording. Response categories included “Improved”, “Remained the same”, or in some cases “Do not have”, which were merged with “Remained the same”. We disaggregate these responses by whether the respondents were resettled and compensated or not.

### Control variables

Stress is likely influenced by a range of variables that are not related to access to basic infrastructure. We control for the sex (male, female) and education (no formal education, primary education, secondary education, and technical or advanced degree) of the interviewee, whether the home had a female head of household, and a two-category variable for community type (downstream and upstream).

## Modeling approach

First, we conducted a cross-tabulation of our outcome variable (stress) with each of the infrastructure predictor variables, running a chi-squared test for each of these relationships and testing the statistical significance of the different proportions, taking as reference  $p < 0.05$ . Then, we applied statistical modeling. Our outcome variable “stress levels” is ordinal. To accommodate this distribution, we use ordinal logistic regression models to understand how our predictors influence stress levels. In [S1 Table](#), we begin by estimating a baseline model (i.e., a model with no interaction term) and then an interaction model for each type of local infrastructure loss, comparing AIC and BIC statistics to determine if the interaction terms have improved model fit [73, 74]. These models allow us to understand whether compensation and resettlement, as interaction terms, reduce the effect of a loss of infrastructure on increased stress. Then, we provide a “full” model that eschews the interaction terms but uses all of the predictors together to understand the combined effects of infrastructure changes ([Table 3](#)). In [Figs 4 and 5](#), we turn to predicted probabilities and average marginal effects, respectively, to more intuitively understand the implications of our models, given the well-known problems with interpreting logistic regression coefficients [75].

## Results

As shown in [Fig 2](#), most respondents reported that the dams had increased their stress (55.3% stated “increased”). Notably, a large minority of respondents stated “remained the same”, and relatively few indicated that the dams had decreased their stress.

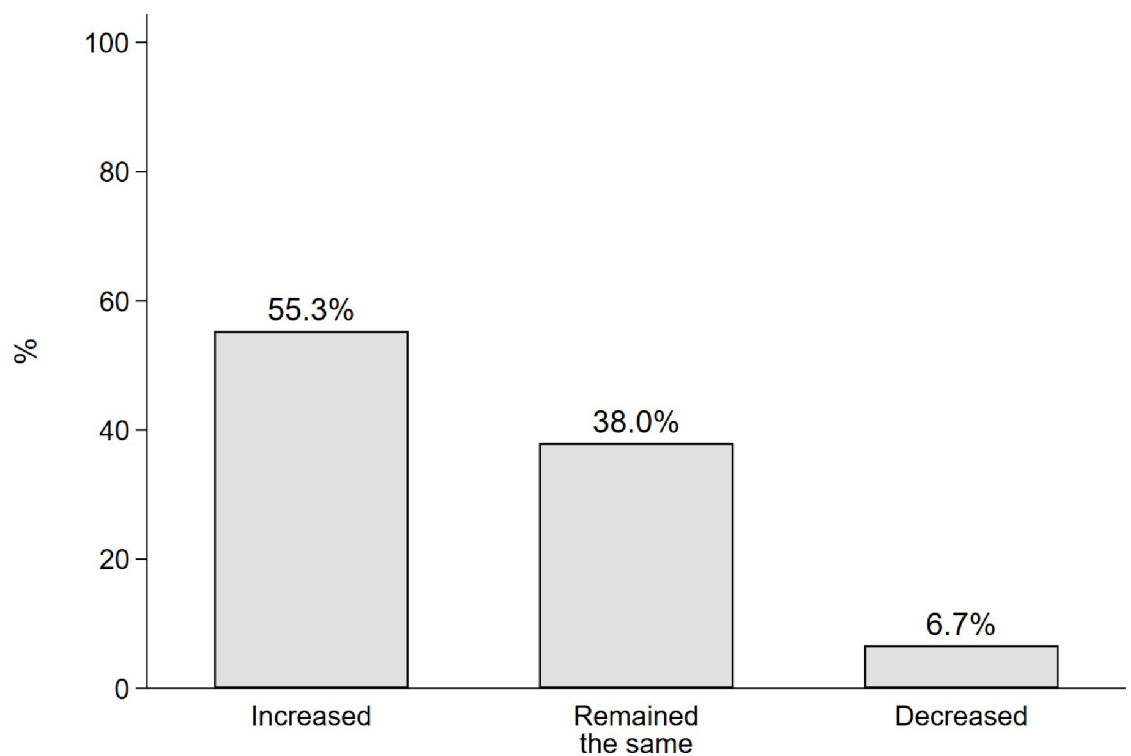

**Fig 2. Distribution of the outcome variable “stress” based on the question.** “Has the amount or level of emotional stress you or others in your household experience remained the same, decreased, or increased (due to the building of the dam(s))?”  $n = 658$ .

<https://doi.org/10.1371/journal.pone.0284760.g002>



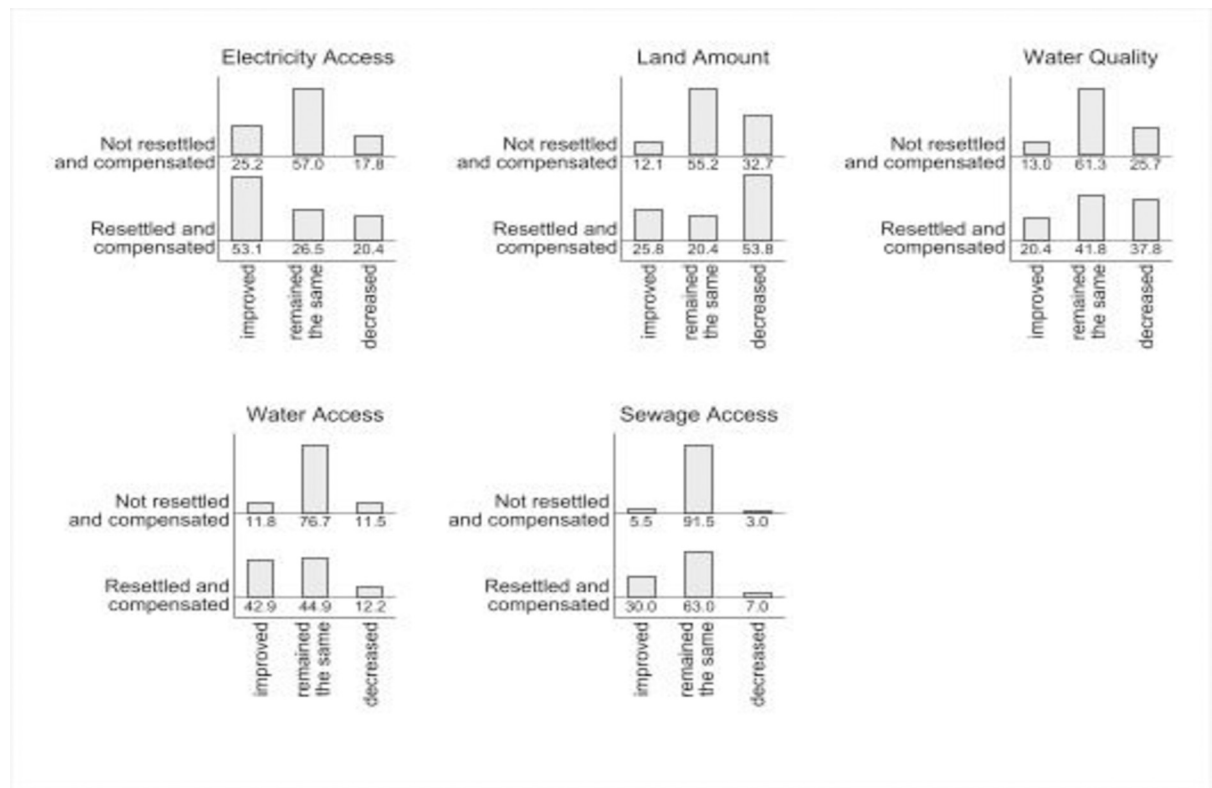

**Fig 3. Changes in access to infrastructure by resettlement and compensation status.** Percentage of respondents who were not resettled and compensated and who were resettled and compensated for each type of infrastructure loss,  $n = 576$ .

<https://doi.org/10.1371/journal.pone.0284760.g003>

According to Fig 3, overall, respondents indicated that access to most infrastructure “decreased” or “remained the same” and the resettled and compensated group were not consistently more likely to state that their access to infrastructure had improved. Importantly, for the resettled and compensated populations, “decreased” answer reach higher proportions than in not resettled and compensated, suggesting that the new infrastructure offered to the resettled and compensated group was not sufficient.

Table 2 provides the cross-tabulation of our outcome variable (stress) with each of the infrastructure predictor variables and a chi-squared test for each of these relationships. We show the number of cases in each cell ( $n$ ) and row percentages. Among those who stated that electricity access had “decreased”, 65% reported that stress had also “increased”, and among those who indicated that “land amount” had “decreased”, 66% also reported “increased” stress—in both cases the relationship between these variables is statistically significant ( $p < 0.05$ ). Those who reported “decreased” access to water quality or “decreased” access to water in general were also more apt to report “Increased Stress” (with 71% and 69% respectively). However, the association between sewage access and stress is not statistically significant, and this may be because many people in rural areas did not have sewage system to begin with. These descriptive results imply that a loss of infrastructure, or lack of improvements in infrastructure, is associated with increased stress due to the construction of the dams.

S1 Table provides baseline and interaction models for each type of strain on local infrastructure, along with AIC and BIC statistics. Our baseline model for “Electricity Access” indicates that those who reported that access had “remained the same” or “decreased” experienced more stress ( $p < 0.05$ ). In the next model, we interact compensation and resettlement with

Table 2. Cross-tabulation of “stress” and community infrastructure variables of communities in the Madeira river basin, Brazil.

|                           | Stress    |        |                   |        |           |        | Total | %   | $\chi^2$ (p-value) |
|---------------------------|-----------|--------|-------------------|--------|-----------|--------|-------|-----|--------------------|
|                           | Decreased |        | Remained the Same |        | Increased |        |       |     |                    |
|                           | n         | %      | n                 | %      | n         | %      |       |     |                    |
| <b>Electricity Access</b> |           |        |                   |        |           |        |       |     |                    |
| Improved                  | 20        | 10.526 | 79                | 41.579 | 91        | 47.895 | 190   | 100 | 15.611(0.004)      |
| Remained the same         | 15        | 4.412  | 137               | 40.294 | 188       | 55.294 | 340   | 100 |                    |
| Decreased                 | 9         | 7.627  | 32                | 27.119 | 77        | 65.254 | 118   | 100 |                    |
| <b>Land Amount</b>        |           |        |                   |        |           |        |       |     |                    |
| Improved                  | 8         | 9.524  | 38                | 45.238 | 38        | 45.238 | 84    | 100 | 18.157(0.000)      |
| Remained the same         | 13        | 4.377  | 126               | 42.424 | 158       | 53.199 | 297   | 100 |                    |
| Decreased                 | 14        | 6.604  | 58                | 27.358 | 140       | 66.038 | 212   | 100 |                    |
| <b>Water Quality</b>      |           |        |                   |        |           |        |       |     |                    |
| Improved                  | 8         | 8.791  | 37                | 40.659 | 46        | 50.549 | 91    | 100 | 28.267(0.000)      |
| Remained the same         | 23        | 6.053  | 168               | 44.211 | 189       | 49.737 | 380   | 100 |                    |
| Decreased                 | 12        | 6.704  | 39                | 21.788 | 128       | 71.508 | 179   | 100 |                    |
| <b>Water Access</b>       |           |        |                   |        |           |        |       |     |                    |
| Improved                  | 13        | 12.150 | 38                | 35.514 | 56        | 52.34  | 107   | 100 | 12.568(0.014)      |
| Remained the same         | 29        | 6.131  | 190               | 40.169 | 254       | 53.70  | 473   | 100 |                    |
| Decreased                 | 2         | 2.667  | 21                | 28.000 | 52        | 69.33  | 75    | 100 |                    |
| <b>Sewage Access</b>      |           |        |                   |        |           |        |       |     |                    |
| Improved                  | 7         | 11.667 | 26                | 43.333 | 27        | 45.000 | 60    | 100 | 5.345(0.254)       |
| Remained the same         | 35        | 6.076  | 218               | 37.847 | 323       | 56.076 | 576   | 100 |                    |
| Decreased                 | 2         | 9.091  | 6                 | 27.273 | 14        | 63.636 | 22    | 100 |                    |

<https://doi.org/10.1371/journal.pone.0284760.t002>

changes in electricity access. The interaction terms are not statistically significant, and the AIC and BIC have both increased, implying that the interaction has not improved model fit—this implies that compensation did not alter the effect of decreased energy access on stress. The next two models use land amount as the primary predictor, wherein those who report that the amount of land they own has “decreased” report greater stress ( $p < 0.001$ ). Here again, the interaction terms are not statistically significant, and the model fit statistics imply that interaction model has a worse fit than the model without the interaction term. The lack of model fit improvement and null interaction imply that the compensation program did not reduce the effect of lost land on stress.

Turning to water quality, those who stated that water quality had “decreased”, compared to those that stated that it had “increased”, have higher stress levels ( $p < 0.01$ ). Once again, the interaction models show that compensation and resettlement did not buffer the effect of a loss of water quality on stress levels, as the interaction terms are not statistically significant, and the AIC and BIC statistics are larger in the interaction model. For water access, the result is similar, i.e., “decreased” water access is associated with higher stress levels ( $p < 0.05$ ) and the interaction with resettled and compensated did not improve the model fit. Our final models for sewage access indicate that individuals who report that sewage access “remained the same” are more likely to state that stress had “increased” ( $p < 0.05$ ). But, as with all our other models, the interaction terms are not statistically significant, and the model fit statistics imply a lack of moderation. That is, in all our models, we are finding that the stress-increased effect of changes in infrastructure is not altered by compensation. Respondents were comparing infrastructure conditions before and after the dams and reported increased stress, but compensation did not reduce the effect of a loss of infrastructure on stress. Our direct effect for community type was significant in most models, with upstream residents reporting increased stress. We also note

**Table 3. Regression model for stress with all infrastructure predictors of communities in the Madeira river basin, Brazil.**

|                                                    | <b>b(se)</b> |
|----------------------------------------------------|--------------|
| <b>Electricity Access (ref. improved)</b>          |              |
| Remained the Same                                  | 0.455*       |
|                                                    | (0.21)       |
| Decreased                                          | 0.717*       |
|                                                    | (0.29)       |
| <b>Land Amount (ref. improved)</b>                 |              |
| Remained the Same                                  | 0.425        |
|                                                    | (0.26)       |
| Decreased                                          | 0.885**      |
|                                                    | (0.27)       |
| <b>Water Quality (ref. improved)</b>               |              |
| Remained the Same                                  | -0.111       |
|                                                    | (0.30)       |
| Decreased                                          | 0.614        |
|                                                    | (0.33)       |
| <b>Water Access (ref. improved)</b>                |              |
| Remained the Same                                  | -0.332       |
|                                                    | (0.32)       |
| Decreased                                          | -0.293       |
|                                                    | (0.41)       |
| <b>Sewage Access (ref. improved)</b>               |              |
| Remained the Same                                  | 0.809*       |
|                                                    | (0.38)       |
| Decreased                                          | 1.164        |
|                                                    | (0.69)       |
| <b>Status (ref. not resettled and compensated)</b> |              |
| Resettled and Compensated                          | -0.054       |
|                                                    | (0.279)      |
| <b>Sex (ref. female)</b>                           |              |
| Male                                               | -0.072       |
|                                                    | (0.23)       |
| <b>Education (ref. no formal education)</b>        |              |
| Primary Education                                  | 0.372        |
|                                                    | (0.27)       |
| Secondary                                          | 0.648*       |
|                                                    | (0.31)       |
| Post-Secondary/ Technical                          | 0.601        |
|                                                    | (0.40)       |
| <b>Sex of the head of household (ref. male)</b>    |              |
| Female head of household                           | 0.109        |
|                                                    | (0.25)       |
| <b>Community type (ref. downstream)</b>            |              |
| Upstream                                           | 0.312        |
|                                                    | (0.20)       |
| AIC                                                | 915.342      |
| BIC                                                | 1001.612     |

Note: N = 554. \*\*\* for p<0.001

\*\* for p<0.01 and \* for p <0.05. Data was gathered in 2020 in the Madeira River Region of the Amazon Basin.

<https://doi.org/10.1371/journal.pone.0284760.t003>

that our variable for resettlement and compensation has a statistically null effect in all the models. That is, compensation does not seem to reduce stress directly.

As we noted above, ordinal logistic regression coefficients are difficult to directly interpret, and it is considered a best practice to not rely purely upon p-values to determine if an interaction is important [75]. Fig 4 displays the interaction between the loss of infrastructure and resettlement and compensation, expressed as the probability of “increased” stress. The graphic corroborates the largely null findings for the interactions reported in S1 Table—with the possible exceptions of the “land amount” and “sewage access”. Further, the gap between the compensated and resettled curve and the curve for those that were not resettled and compensated is miniscule, again implying that compensation likely did not redress the stress induced by a loss of infrastructure.

Next, in Table 3 we turn to our “full” model that drops the interaction terms and uses each loss of service as predictors. We find that, compared to those who reported that electricity access improved, those who stated that it “decreased” were more likely to state that their stress had “increased”. We find similar results for land amount, but the effect of water quality and water access is not statistically significant in this model, implying that the effect of a loss of water quality and access is less robust.

In Fig 5, we present Average Marginal Effects (AMEs) derived from the models reported in Table 3. In our application, the average marginal effects represent the effect of a one-unit change in the predictor on the probability of “increased” stress. Please note that “improved” serves as the reference category, so its average marginal effect is zero. The AMEs for electricity access and land amount show a similar pattern—the “remained the same” category is around 0.3 and the “decreased” category moves close to 0.10 (i.e., a 0.10 increase in the probability of

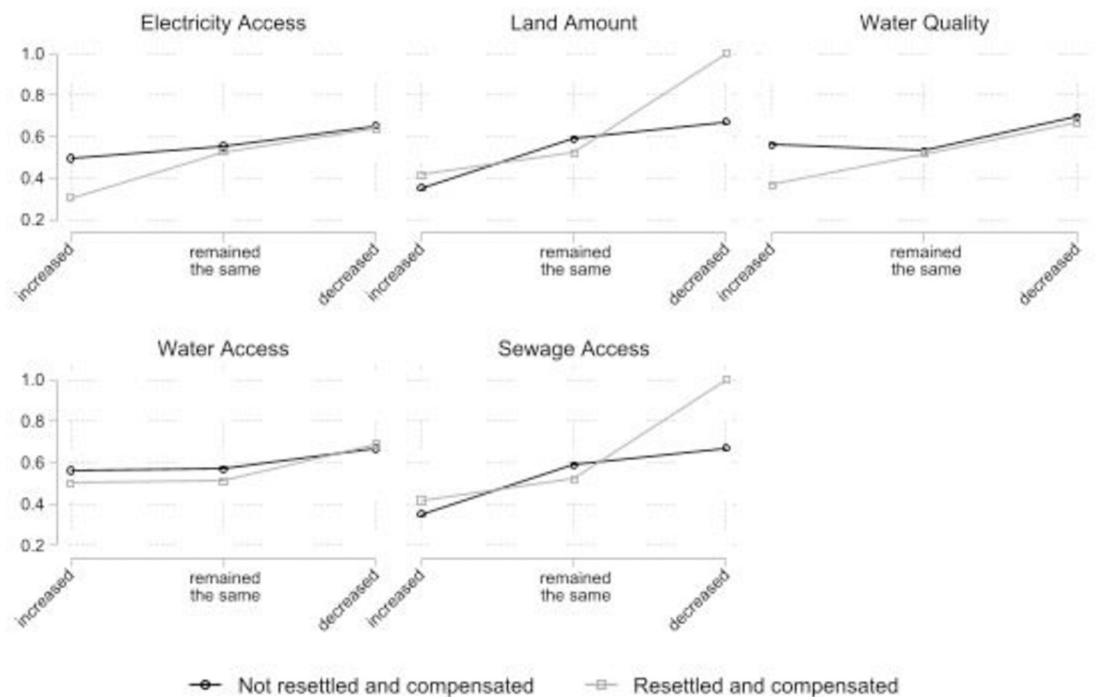

**Fig 4. Probability of “increased stress” by interaction of the infrastructure variables with resettlement and compensation.** Estimates were derived from the “Interaction” ordinal logistic regression models reported in S1 Table with all other predictors held at their observed values.

<https://doi.org/10.1371/journal.pone.0284760.g004>

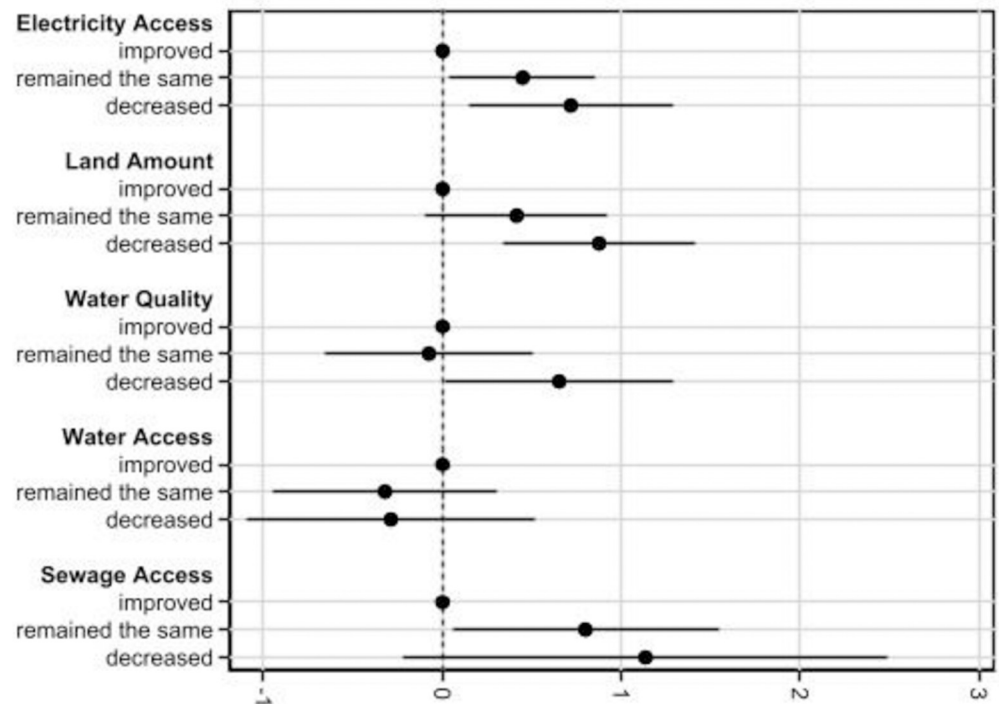

Fig 5. Average marginal effects with 95% confidence intervals derived from the “Full” model (Table 3). The AMEs show the change in probability of “increased” stress.

<https://doi.org/10.1371/journal.pone.0284760.g005>

“increased” stress). For water quality, “remained the same” has a small, possibly negative, effect, but the confidence interval indicates that it is not statistically significant. “Decreased” water quality, on the other hand, may heighten the probability of “increased” stress by some 0.7. Water access has negative AMEs (i.e., lower probability of “Increased” stress) but neither is statistically significant, while those that report that sewage access “remained the same” has a somewhat higher probability of increased stress. The AMEs imply that the effect of any one loss of service may not be especially powerful, but some households likely experienced multiple losses, which could converge to markedly increase the probability of increased stress.

## Discussion

In this paper, we have showed that, despite resettlement and compensation efforts, communities near hydropower projects in the Madeira river basin in Brazil experienced increased stress levels associated with deterioration in access to infrastructure, such as water and sewage. Our results show that most respondents reported that their stress level had increased because of the dam construction. Following the literature [14, 55], we suggest that large hydropower projects, such as the Jirau and Santo Antônio dams, make some kinds of promised infrastructure more difficult to access or more expensive, possibly because of the sudden influx to the region of workers needed to construct the dams, because resources might be re-directed towards dam construction, in addition to the inflation caused by this boom, but also because of the conditions of the resettled communities. A very common finding across the literature is that when land is given as compensation, it is rarely if ever of the same quality as what people had before and thus this injustice is a source of substantial stress to resettled people [76]. This is true in our study for those communities which received land as compensation (e.g., Riacho Azul,

Nova Mutum). For that reason, often dam builders prefer to compensate with cash or houses. These losses could increase stress. Using interaction terms, we also asked how being compensated and resettled might reduce these impacts. Our results indicate that individuals who lost access to infrastructure—particularly reduced land and access to water—experienced increased stress and the compensation and resettled program did not reduce this effect. Strain on infrastructure, loss of public services, and a loss of resources is one mechanism by which hydropower projects create a reduction of well-being.

The prior literature has often studied communities that were directly involved in compensation programs and were included in formal efforts to address the problems caused by dam projects [e.g., 61]. Our study allowed us to go one step further, since we selected communities that are located both upstream and downstream from the dam and are geographically diffuse (see Fig 1). The prevalence of impacts and associated stress in ostensibly far-away communities, that dam builders claimed would not be impacted (and therefore are not included in the environmental and social impact assessments), indicates that hydropower projects have impacts that reverberate throughout a relatively large geographic region. This increased stress existed for years after the dams were constructed. To some extent, these results lend support to Scudder's argument that hydropower impacts are so large that a generation may pass before a community recovers [21] and points to the need for long-term research.

Compensation programs have the potential to redress the losses experienced by communities that are impacted by hydropower projects. To date, the literature has mostly been critical of these programs, arguing that they are often implemented with little consultation with communities, are generally insufficient, and often exclude damages and communities that are nevertheless impacted [27, 28]. In all our models, our indicator for compensation and resettlement was not statistically significant and the effect was small in practical terms. That is, compensated individuals did not report lower stress across multiple models, suggesting that they experienced impacts the same as the uncompensated and were not made better off through compensation alone. Further, our interaction models imply that compensation did not blunt the effect of a loss of resources. For instance, we found that decreased access to electricity increased stress, and this effect was not weakened, reduced, or otherwise altered by compensation programs. Resettled people claim to have been surprised with the high energy bills in their new homes, compared to the bills they used to pay in the past. It is worth mentioning that other social services, conditions for production in the communities and the necessary logistics foreseen in the Basic Environmental Plan (Plano Básico Ambiental—PBA, in the Portuguese acronym) (Santo Antônio Energia 2022) were not implemented or were only partially provided.

Each of the communities in this study suffered a variety of broken promises that may explain why compensation alone did not mitigate the stress felt by the communities. Compensation practices are typically neither transparent nor sufficient [19], and resettled families are rarely given much choice in where they can resettle, and whether they can still live close to friends and family. Dam proponents often make promises to improve water quality and sewage systems, while also promising jobs and economic development, a dubious promise [17]. Future research is needed to determine how, or even if, compensation programs can effectively redress the damages caused by hydropower projects, including psychological and social outcomes that are often not considered.

Despite the efforts of activists, scientists, and other concerned groups, the Brazilian government has plans to continue to expand hydropower in coming years. Other nations, like China, will likely build additional hydropower capacity to satisfy the energy needs of their growing economies [77]. Moving forward, we argue that compensation practices and consultation with communities must be improved, and efforts must be made to ensure that communities near



dam projects can access key infrastructure and services. Importantly, this loss of access has real implications—for example, losing access to electricity through exponential price increases lead to higher stress levels. Dam builders and associated governments could implement programs to protect community infrastructure, services and resources, in addition to compensating individual households with cash payments or assets such as housing. Compensation should also consider losses in relevant skills, knowledge, bonds of cooperation among neighbors and merchants, and other intangible losses that come from the values and bonds community membership had created, relations to their previous land use, and community social structure. This more holistic approach to compensation has the potential to reduce stress, and improve well-being more broadly.

## Supporting information

**S1 Table. Ordinal logistic regression models for increased stress in the Madeira river basin, Brazil.**

(DOCX)

**S1 Dataset.**

(XLSX)

## Acknowledgments

The authors wish to thank their colleagues at the Federal University of Rondônia (UNIR) who provided local support and expert advice that made survey question formulation and its field collection possible. Numerous students from this university served as enumerators and their local knowledge was very important to this work. They also wish to thank postdocs Juliana Laffer, Amanda Silvino, and Jynessa Dutka-Gianelli, who were in charge of the field survey; Carolina Doria, and Mariluce Paes and other faculty at UNIR were always ready to support the work and we are grateful. Finally, Laura Castro-Diaz and Maria Alejandra Garcia provided immense support on the survey design. Finally, the people in the eight communities were patient in answering our numerous questions and we hope the results herein can lead to improved livelihoods in the future. Despite all this, the authors wish to declare that any errors are the sole responsibility of the authors.

## Author Contributions

**Funding acquisition:** Emilio F. Moran.

**Investigation:** Maria Claudia Lopez.

**Methodology:** Adam Mayer.

**Project administration:** Maria Claudia Lopez, Emilio F. Moran.

**Resources:** Emilio F. Moran.

**Supervision:** Maria Claudia Lopez.

**Validation:** Adam Mayer.

**Writing – original draft:** Adam Mayer, Igor Cavallini Johansen, Maria Claudia Lopez, Mariluce Paes de Souza, Emilio F. Moran.

**Writing – review & editing:** Adam Mayer, Igor Cavallini Johansen, Maria Claudia Lopez, Mariluce Paes de Souza, Emilio F. Moran.

## References

1. Zarfl C, Lumsdon AE, Berlekamp J, Tydecks L, Tockner K. A global boom in hydropower dam construction. *Aquatic Sciences*. 2015; 77: 161–170.
2. Almeida RM, Hamilton SK, Rosi EJ, Barros N, Doria CR, Flecker AS, et al. Hydropeaking operations of two run-of-river mega-dams alter downstream hydrology of the largest Amazon tributary. *Frontiers in Environmental Science*. 2020.
3. Dranka GG, Ferreira P. Planning for a renewable future in the Brazilian power system. *Energy*. 2018; 164: 496–511.
4. Bratman EZ. Contradictions of green development: Human rights and environmental norms in light of Belo Monte dam activism. *Journal of Latin American Studies*. 2014; 46: 261–289.
5. Bratman E. Passive revolution in the green economy: activism and the Belo Monte dam. *International Environmental Agreements: Politics, Law and Economics*. 2015; 15: 61–77.
6. Klein PT. *Flooded: Development, Democracy, and Brazil's Belo Monte Dam*. Rutgers University Press; 2022.
7. Arantes CC, Laufer J, Pinto MD da S, Moran EF, Lopez MC, Dutka-Gianelli J, et al. Functional responses of fisheries to hydropower dams in the Amazonian Floodplain of the Madeira River. *Journal of Applied Ecology*. 2021.
8. Castro-Diaz L, Lopez MC, Moran E. Gender-differentiated impacts of the Belo Monte hydroelectric dam on downstream fishers in the Brazilian Amazon. *Human Ecology*. 2018; 46: 411–422.
9. da Costa Doria CR, Athayde S, Marques EE, Lima MAL, Dutka-Gianelli J, Ruffino ML, et al. The invisibility of fisheries in the process of hydropower development across the Amazon. *Ambio*. 2018; 47: 453–465. <https://doi.org/10.1007/s13280-017-0994-7> PMID: 29210012
10. Doria CR, Dutka-Gianelli J, Paes de Souza M, Lorenzen K, Athayde S. Stakeholder Perceptions on the Governance of Fisheries Systems Transformed by Hydroelectric Dam Development in the Madeira River, Brazil. *Frontiers in Environmental Science*. 2021; 9: 59.
11. Santos RE, Pinto-Coelho RM, Fonseca R, Simões NR, Zanchi FB. The decline of fisheries on the Madeira River, Brazil: The high cost of the hydroelectric dams in the Amazon Basin. *Fisheries management and ecology*. 2018; 25: 380–391.
12. Bertassoli DJ Jr, Sawakuchi HO, de Araújo KR, de Camargo MG, Alem VA, Pereira TS, et al. How green can Amazon hydropower be? Net carbon emission from the largest hydropower plant in Amazonia. *Science Advances*. 2021; 7: eabe1470. <https://doi.org/10.1126/sciadv.abe1470> PMID: 34172455
13. Fearnside PM. Credit for climate mitigation by Amazonian dams: Loopholes and impacts illustrated by Brazil's Jirau Hydroelectric Project. *Carbon Management*. 2013; 4: 681–696.
14. dos Santos MA, Amorim MA, Maddock JEL, Lessa AC, Damázio JM, de Medeiros AM, et al. Pre-existing greenhouse gas emissions from Brazilian hydropower reservoirs. *Ecohydrology & Hydrobiology*. 2019; 19: 541–553.
15. Lees AC, Peres CA, Fearnside PM, Schneider M, Zuanon JA. Hydropower and the future of Amazonian biodiversity. *Biodiversity and conservation*. 2016; 25: 451–466.
16. Barros N, Cole JJ, Tranvik LJ, Prairie YT, Bastviken D, Huszar VL, et al. Carbon emission from hydroelectric reservoirs linked to reservoir age and latitude. *Nature geoscience*. 2011; 4: 593–596.
17. de Araújo KR, Sawakuchi HO, Bertassoli DJ Jr, Sawakuchi AO, da Silva KD, Vieira TB, et al. Carbon dioxide (CO<sub>2</sub>) concentrations and emission in the newly constructed Belo Monte hydropower complex in the Xingu River, Amazonia. *Biogeosciences*. 2019; 16: 3527–3542.
18. Fan P, Cho MS, Lin Z, Ouyang Z, Qi J, Chen J, et al. Recently constructed hydropower dams were associated with reduced economic production, population, and greenness in nearby areas. *Proceedings of the National Academy of Sciences*. 2022; 119: e2108038119. <https://doi.org/10.1073/pnas.2108038119> PMID: 35131897
19. Cernea MM. *Hydropower dams and social impacts: a sociological perspective*. The World Bank; 1997.
20. Cernea MM. Social impacts and social risks in hydropower programs: Preemptive planning and counter-risk measures. Keynote Address: Session on Social Aspects of Hydropower Development United Nations Symposium on Hydropower and Sustainable Development Beijing, China. 2004.
21. Mayer A, Castro-Diaz L, Lopez MC, Leturcq G, Moran EF. Is hydropower worth it? Exploring amazonian resettlement, human development and environmental costs with the Belo Monte project in Brazil. *Energy Research & Social Science*. 2021; 78: 102129.
22. Scudder T. The world commission on dams and the need for a new development paradigm. *International Journal of Water Resources Development*. 2001; 17: 329–341.

23. Wilmsen B, van Hulten A. Following resettled people over time: the value of longitudinal data collection for understanding the livelihood impacts of the Three Gorges Dam, China. *Impact Assessment and Project Appraisal*. 2017; 35: 94–105. <https://doi.org/10.1080/14615517.2016.1271542>
24. García MA, Castro-Díaz L, Villamayor-Tomas S, Lopez MC. Are large-scale hydroelectric dams inherently undemocratic? *Global Environmental Change*. 2021; 71: 102395.
25. Wang QG, Du YH, Su Y, Chen KQ. Environmental impact post-assessment of dam and reservoir projects: a review. *Procedia Environmental Sciences*. 2012; 13: 1439–1443.
26. Ty PH, Van Westen ACM, Zoomers A. Compensation and resettlement policies after compulsory land acquisition for hydropower development in Vietnam: policy and practice. *Land*. 2013; 2: 678–704.
27. Cernea M. Compensation and benefit sharing: Why resettlement policies and practices must be reformed. *Water Science and Engineering*. 2008; 1: 89–120. [https://doi.org/10.1016/S1674-2370\(15\)30021-1](https://doi.org/10.1016/S1674-2370(15)30021-1)
28. Van Cleef A. Hydropower development and involuntary displacement: Toward a global solution. *Ind J Global Legal Stud*. 2016; 23: 349.
29. Vanclay F. Project-induced displacement and resettlement: from impoverishment risks to an opportunity for development? *Impact Assessment and Project Appraisal*. 2017; 35: 3–21.
30. Cortese CF, Jones B. The sociological analysis of boom towns. *Western Sociological Review*. 1977; 8: 76–90.
31. England JL, Albrecht SL. Boomtowns and social disruption. *Rural Sociology*. 1984; 49: 230.
32. Freudenburg WR. Women and men in an energy boomtown: adjustment, alienation, and adaptation. *Rural Sociology*. 1981; 46: 220.
33. Mayer A, Lopez MC, Cavallini Johansen I, Moran E. Hydropower, Social Capital, Community Impacts, and Self-Rated Health in the Amazon. *Rural Sociology*. 2021.
34. Atkins E. Contesting the ‘greening’ of hydropower in the Brazilian Amazon. *Political Geography*. 2020; 80: 102179.
35. Moran EF. Changing how we build hydropower infrastructure for the common good: lessons from the Brazilian Amazon. *Civitas-Revista de Ciências Sociais*. 2020; 20: 5–15.
36. Gauthier C, Lin Z, Peter BG, Moran EF. Hydroelectric infrastructure and potential groundwater contamination in the Brazilian Amazon: Altamira and the Belo Monte Dam. *The Professional Geographer*. 2019; 71: 292–300.
37. Gauthier C, Moran EF. Public policy implementation and basic sanitation issues associated with hydroelectric projects in the Brazilian Amazon: Altamira and the Belo Monte dam. *Geoforum*. 2018; 97: 10–21.
38. Mayer A, Lopez MC, Leturcq G, Moran E. Changes in Social Capital Associated with the Construction of the Belo Monte Dam: Comparing a Resettled and a Host Community. *Human Organization*. 2022; 81: 22–34.
39. Wilmsen B, Webber M, Yuefang D. Development for whom? Rural to urban resettlement at the Three Gorges Dam, China. *Asian Studies Review*. 2011; 35: 21–42.
40. Green WN, Baird IG. Capitalizing on compensation: Hydropower resettlement and the commodification and de-commodification of nature–society relations in southern Laos. *Annals of the American Association of Geographers*. 2016; 106: 853–873.
41. Xi J, Hwang S-S. Unmet expectations and symptoms of depression among the Three Gorges Project resettlers. *Social science research*. 2011; 40: 245–256. <https://doi.org/10.1016/j.ssresearch.2010.09.001> PMID: 21278844
42. Camasmie Abe K, Miraglia SGEK. Dengue incidence and associated costs in the periods before (2000–2008) and after (2009–2013) the construction of the hydroelectric power plants in Rondonia, Brazil. *Epidemiologia e Serviços de Saúde*. 2018; 27: e2017232.
43. Del Bene D, Scheidel A, Temper L. More dams, more violence? A global analysis on resistances and repression around conflictive dams through co-produced knowledge. *Sustainability science*. 2018; 13: 617–633.
44. Hacon SS, Dórea JG, Fonseca M de F, Oliveira BA, Mourão DS, Ruiz C, et al. The influence of changes in lifestyle and mercury exposure in riverine populations of the Madeira River (Amazon Basin) near a hydroelectric project. *International journal of environmental research and public health*. 2014; 11: 2437–2455. <https://doi.org/10.3390/ijerph110302437> PMID: 24577285
45. Phung D, Nguyen-Huy T, Tran NN, Tran DN, Nghiem S, Nguyen NH, et al. Hydropower Dams, River Drought and Health Effects: A Detection and Attribution Study in the Lower Mekong Delta Region. *Climate Risk Management*. 2021; 100280.

46. Veronez DV, Abe KC, Miraglia SGEK. Health impact assessment of the construction of hydroelectric dams in Brazil. *Chronicles of Health Impact Assessment*. 2018; 3: 11–36.
47. Yewhalaw D, Getachew Y, Tushune K, Kassahun W, Duchateau L, Speybroeck N. The effect of dams and seasons on malaria incidence and anopheles abundance in Ethiopia. *BMC infectious diseases*. 2013; 13: 1–9.
48. Tilt B, Gerkey D. Dams and population displacement on China's Upper Mekong River: Implications for social capital and social–ecological resilience. *Global Environmental Change*. 2016; 36: 153–162.
49. Wang Y, Gao M, Zuo J, Bartsch K. Social capital and social integration after project-induced displacement and resettlement: exploring the impact on three life stages in the Three Gorges Project. *The Social Science Journal*. 2020; 1–19.
50. Abrampah DAM. Strangers on their own land: Examining community identity and social memory of relocated communities in the area of the Bui Dam in West-Central Ghana. *Human Organization*. 2017; 76: 291–303.
51. Bisht TC. Development-induced displacement and women: The case of the Tehri Dam, India. *The Asia Pacific Journal of Anthropology*. 2009; 10: 301–317.
52. Urban F, Nordensvard J, Siciliano G, Li B. Chinese Overseas Hydropower Dams and Social Sustainability: The Bui Dam in Ghana and the Kamchay Dam in Cambodia. *Asia & the Pacific Policy Studies*. 2015; 2: 573–589.
53. Kanbur R. Development economics and the compensation principle. *International Social Science Journal*. 2003; 55: 27–35. <https://doi.org/10.1111/1468-2451.5501003>
54. Yu B, Xu L. Review of ecological compensation in hydropower development. *Renewable and Sustainable Energy Reviews*. 2016; 55: 729–738. <https://doi.org/10.1016/j.rser.2015.10.038>
55. Wang P, Lassoie JP, Dong S, Morreale SJ. A framework for social impact analysis of large dams: A case study of cascading dams on the Upper-Mekong River, China. *Journal of Environmental Management*. 2013; 117: 131–140. <https://doi.org/10.1016/j.jenvman.2012.12.045> PMID: 23380304
56. Hanna P, Vanclay F, Langdon EJ, Arts J. The importance of cultural aspects in impact assessment and project development: reflections from a case study of a hydroelectric dam in Brazil. *Impact assessment and project appraisal*. 2016; 34: 306–318.
57. Stone AA, Mackie CE. *Subjective well-being: measuring happiness, suffering, and other dimensions of experience*. National Academies Press; 2013.
58. Cao Y, Hwang S-S, Xi J. Project-induced displacement, secondary stressors, and health. *Social science & medicine*. 2012; 74: 1130–1138. <https://doi.org/10.1016/j.socscimed.2011.12.034> PMID: 22341203
59. Randell H. The short-term impacts of development-induced displacement on wealth and subjective well-being in the Brazilian Amazon. *World development*. 2016; 87: 385–400. <https://doi.org/10.1016/j.worlddev.2016.07.005> PMID: 28316364
60. Scudder T, Colson E. *From welfare to development: A conceptual framework for the analysis of dislocated people. Involuntary migration and resettlement*. Routledge; 2019. pp. 267–287.
61. Weist KM. Development refugees: Africans, Indians and the big dams. *Journal of Refugee Studies*. 1995; 8: 163–184.
62. Werner D. Psycho-social stress and the construction of a flood-control dam in Santa Catarina, Brazil. *Human Organization*. 1985; 44: 161–167. <https://doi.org/10.17730/humo.44.2.b38h072057u02106> PMID: 11617166
63. Fearnside PM. Impacts of Brazil's Madeira River dams: Unlearned lessons for hydroelectric development in Amazonia. *Environmental Science & Policy*. 2014; 38: 164–172.
64. Gugliano AA, Luiz AMMT. Reducing public participation in a formal procedure: Limits of public meetings concerning the installation of the dams of the Madeira River (Brazilian Amazon). *Environmental Quality Management*. 2019; 28: 21–26.
65. Rodrigues Rezende R. *Navigating the Turbulent Waters of Public Participation in Brazil: A Case Study of the Santo Antônio and Jirau Hydroelectric Dams*. Master's Thesis. 2009.
66. Mayer A, García MA, Castro-Díaz L, Lopez MC, Moran EF. Pretend Participation: Procedural Injustices in the Madeira Hydroelectric Complex. *Global Environmental Change*. 2022; 75: 102524.
67. Arantes CC, Laufer J, Mayer A, Moran EF, Sant'Anna IR, Dutka-Gianelli J, et al. Large-scale hydropower impacts and adaptation strategies on rural communities in the Amazonian floodplain of the Madeira River. *Journal of Environmental Management*. 2023; 336: 117240. <https://doi.org/10.1016/j.jenvman.2023.117240> PMID: 36870321
68. Cohen S, Kamarck T, Mermelstein R. Perceived stress scale (PSS). *J Health Soc Beh*. 1983; 24: 285.

69. Hewitt PL, Flett GL, Mosher SW. The Perceived Stress Scale: Factor structure and relation to depression symptoms in a psychiatric sample. *Journal of Psychopathology and Behavioral Assessment*. 1992; 14: 247–257.
70. Weil F, Lee MR, Shihadeh ES. The burdens of social capital: How socially-involved people dealt with stress after Hurricane Katrina. *Social Science Research*. 2012; 41: 110–119. <https://doi.org/10.1016/j.ssresearch.2011.06.006> PMID: 23017700
71. Feldman PJ, Cohen S, Lepore SJ, Matthews KA, Kamarck TW, Marsland AL. Negative emotions and acute physiological responses to stress. *Annals of Behavioral Medicine*. 1999; 21: 216–222. <https://doi.org/10.1007/BF02884836> PMID: 10626027
72. Kopp MS, Thege BK, Balog P, Stauder A, Salavecz G, Rózsa S, et al. Measures of stress in epidemiological research. *Journal of psychosomatic research*. 2010; 69: 211–225. <https://doi.org/10.1016/j.jpsychores.2009.09.006> PMID: 20624521
73. Burnham KP, Anderson DR. Multimodel inference: understanding AIC and BIC in model selection. *Sociological methods & research*. 2004; 33: 261–304.
74. Kuha J. AIC and BIC: Comparisons of assumptions and performance. *Sociological methods & research*. 2004; 33: 188–229.
75. Brambor T, Clark WR, Golder M. Understanding interaction models: Improving empirical analyses. *Political analysis*. 2006; 14: 63–82.
76. Scudder T, Assistance S, Gay J. A comparative survey of dam-induced resettlement in 50 cases. 2005.
77. Li X, Chen Z, Fan X, Cheng Z. Hydropower development situation and prospects in China. *Renewable and Sustainable Energy Reviews*. 2018; 82: 232–239.
